# Supplementary material for: Highly active and selective catalysts for olefin hydrosilylation reactions using metalloporphyrins intercalated in natural clays
Source: Royal Society of Chemistry journal article supplement (doi:10.1039/c5re00010f), 2015-11-04
Supplement: c5re00010f1.pdf [file c5re00010f1.pdf]

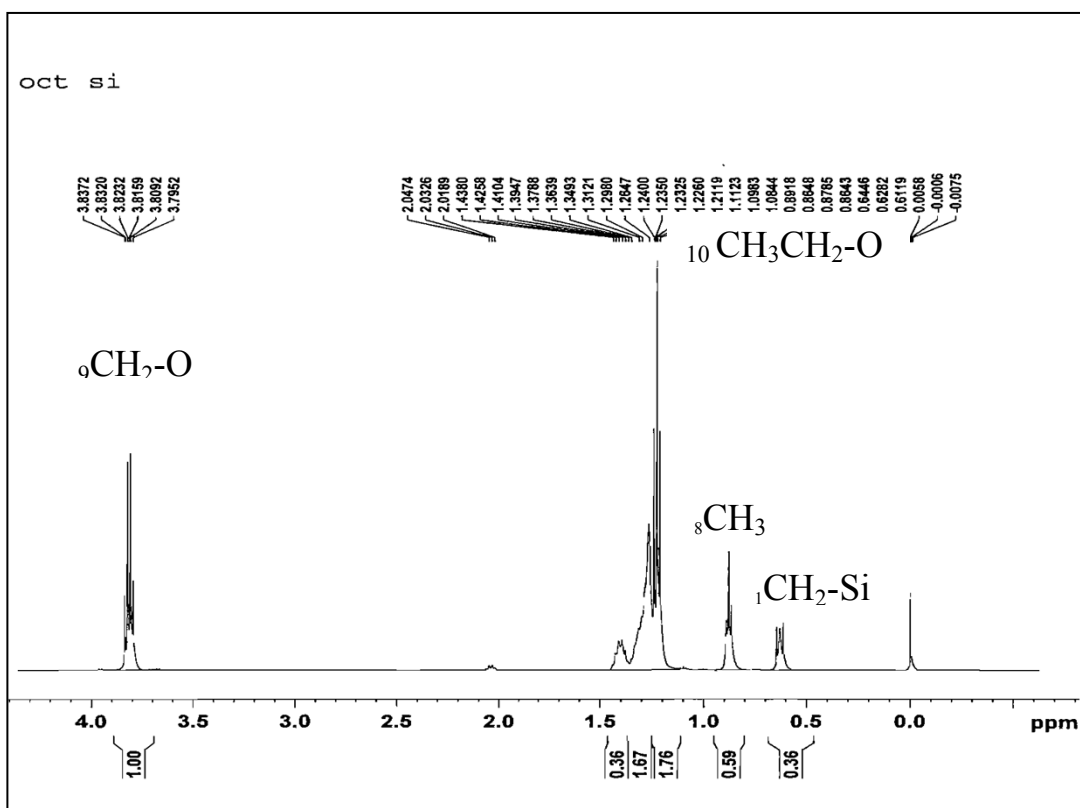

S1:  $^1\text{H}$ NMR for the isolated product tri(ethoxy)silyl-1-octane

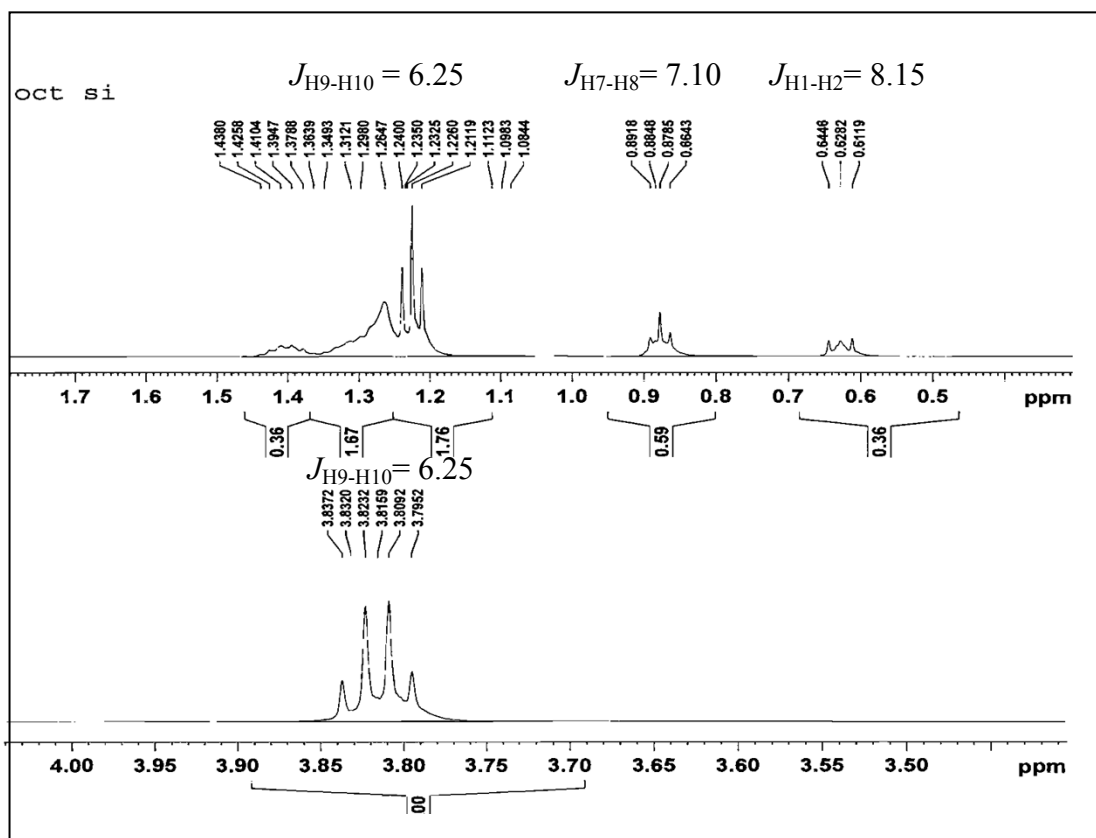

S2: Expanded  $^1\text{H}$ NMR chart for the isolated product tri(ethoxy)silyl-1-octane.

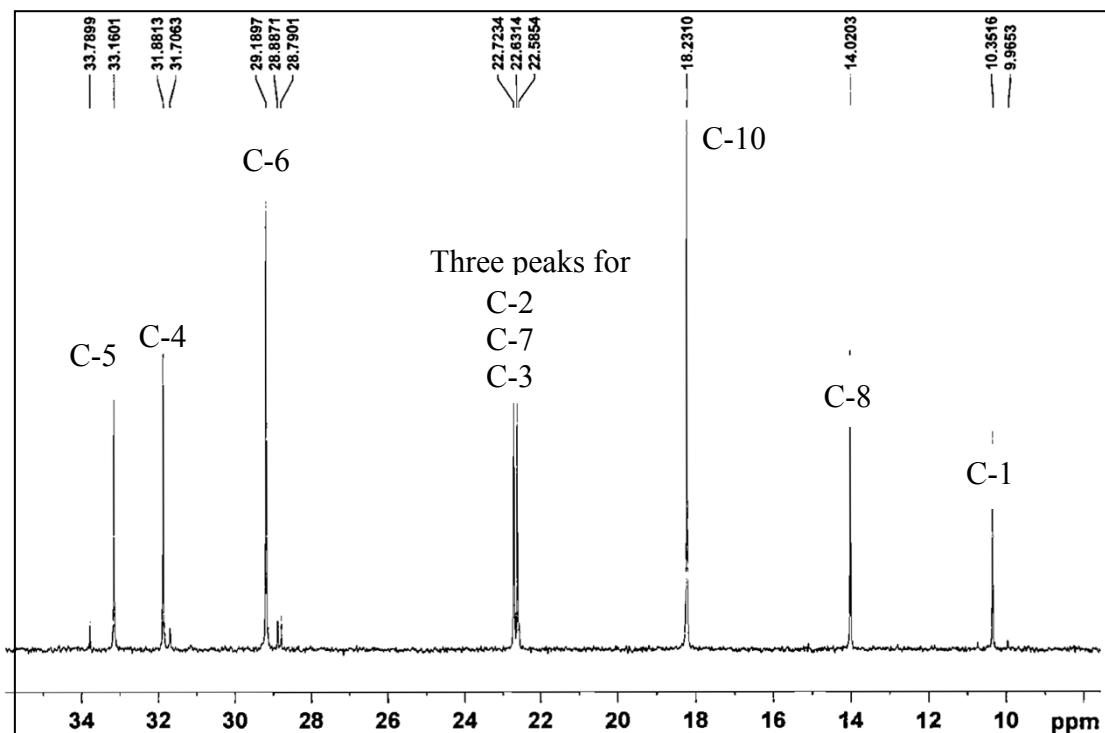

S3:  $^{13}\text{C}$  NMR chart for the isolated product tri(ethoxy)silyl-1-octane.

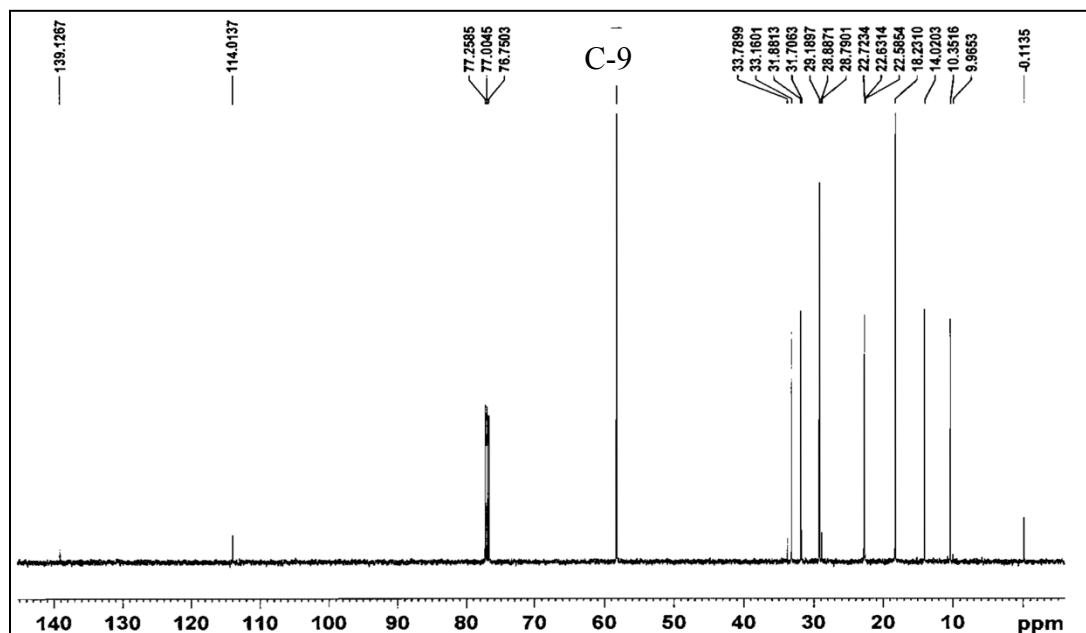

S4: Expanded  $^{13}\text{C}$ NMR chart for the isolated product tri(ethoxy)silyl-1-octane.

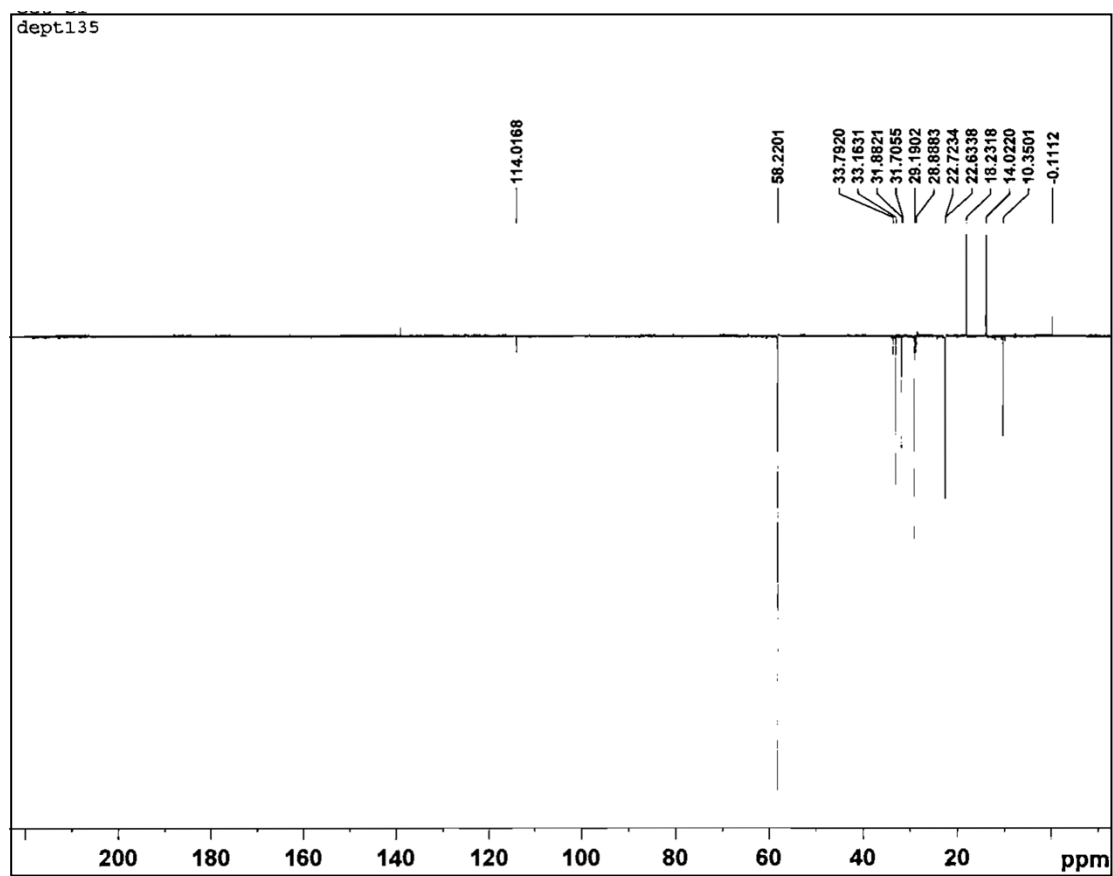

S5: Dept135  $^{13}\text{C}$ NMR for the isolated product tri(ethoxy)silyl-1-octane.
